# Supplementary material for: Morphine may act via DDX49 to inhibit hepatocellular carcinoma cell growth
Source: publisher site journal article supplement (doi:10.18632/aging.202946), 2021-05-05
Supplement: Supplementary file [file aging-v13i9-202946-supplementary-material-SD1.pdf]

**SUPPLEMENTARY FIGURE**

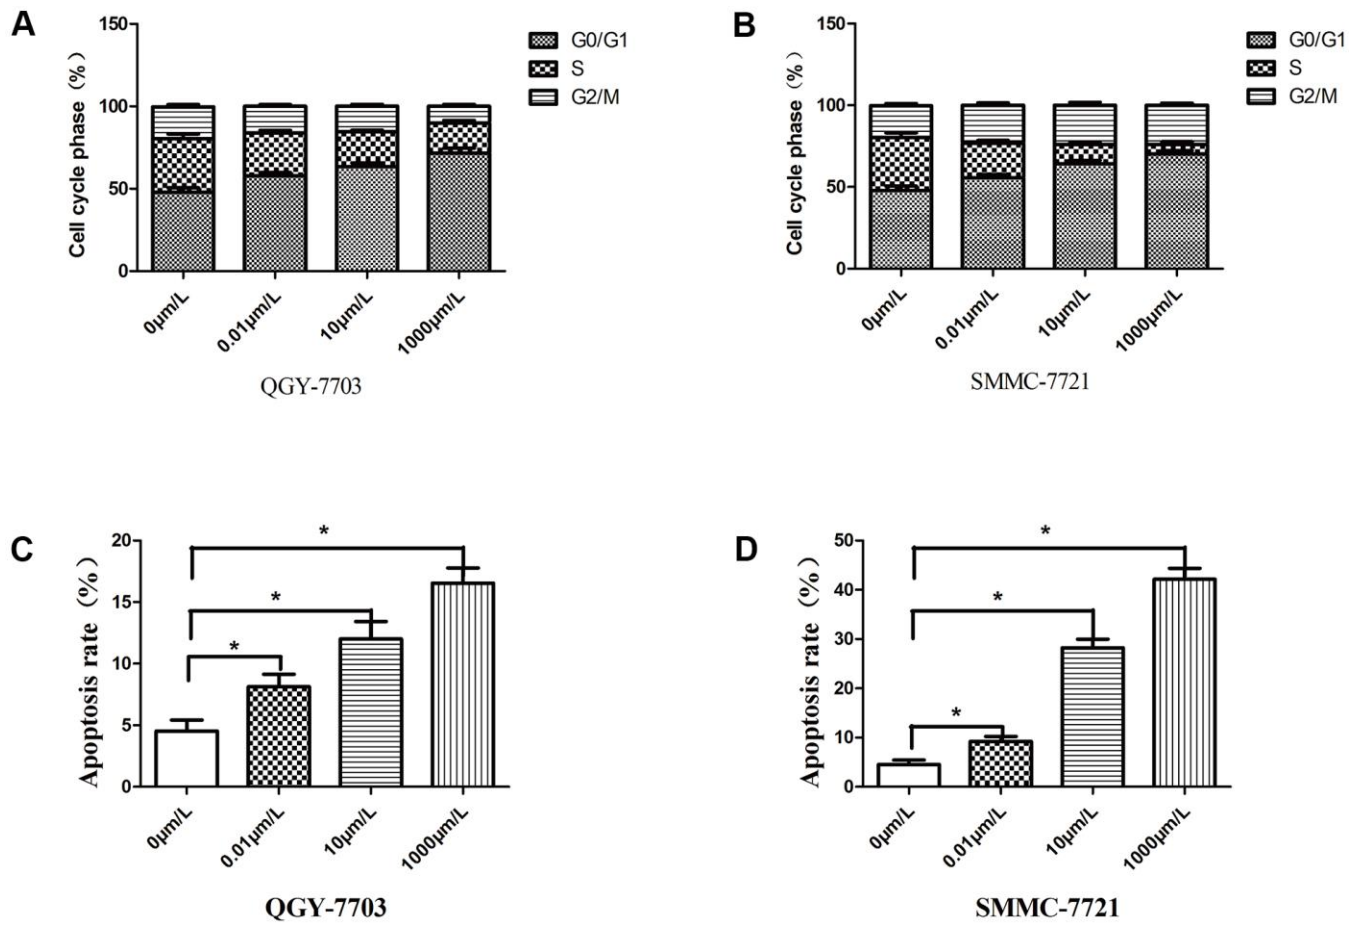

**Supplementary Figure 1. Effect of morphine on HCC cell cycle and apoptosis *in vitro*.** The two HCC cell lines QGY-7703 and SMMC-7721 were treated with morphine at the indicated dose for 48 h, then analyzed for cell cycle distribution and apoptosis by flow cytometry. (A, B) Cell cycle distribution of. (C, D) Apoptosis rates in the cell lines of QGY-7703 and SMMC-7721 were assessed using flow cytometry. \* P < 0.05 compared to the untreated control.
